# The American Psychiatric Association Publishing Textbook of Neuropsychiatry and Clinical Neurosciences, Sixth Edition

*Edited by David B. Arciniegas, M.D., Stuart C. Yudofsky, M.D.,  
and Robert E. Hales, M.D., M.B.A.*

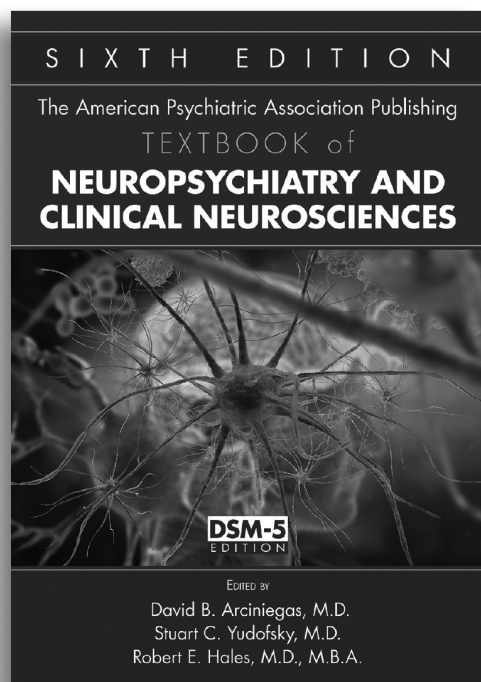

For more than three decades, the *Textbook of Neuropsychiatry and Clinical Neurosciences* has been the gold standard for understanding the structural and functional foundations and rapidly evolving knowledge base of neuropsychiatric disorders. In the new edition, the esteemed editors have undertaken a complete reorganization, reconceptualizing the way the material is presented and integrating considerations of neuropsychiatric symptoms, syndromes, and treatments into chapters addressing the neuropsychiatry of neurodevelopmental disorders, acquired neurological conditions, neurodegenerative disorders, and primary psychiatric disorders.

The result is a text that flows easily and logically from general principles to specific diagnostic tools and conditions, making it a clinically relevant and eminently practical guide for medical students and residents,

psychiatrists, neurologists, psychologists and neuropsychologists, as well as a broad range of professionals who work in diverse clinical settings.

The *Textbook of Neuropsychiatry and Clinical Neurosciences* provides comprehensive, current, and evidence-based coverage in a forward-looking volume to train a new generation of clinicians in this important work.

2018 • 624 pages • ISBN 978-1-58562-487-4 • Hardcover • \$220.00 • Item #62487  
2018 • 624 pages • ISBN 978-1-61537-187-7 • eBook • \$207.00 • Item #37187

AMERICAN  
PSYCHIATRIC  
ASSOCIATION  
PUBLISHING

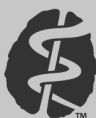

Order online @ [appi.org](http://appi.org)  
or Call Toll Free: 1-800-368-5777  
Email: [appi@psych.org](mailto:appi@psych.org)

20% Discount for American Psychiatric Association Members  
25% Discount for APA Resident-Fellow Members

Priority Code AH1834A

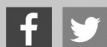

# American Neuropsychiatric Association

The American Neuropsychiatric Association (ANPA), established in 1988, is an organization of professionals in neuropsychiatry, behavioral neurology, neuropsychology and the clinical neurosciences. Our mission is to improve the lives of people with disorders at the interface of psychiatry and neurology.

Our diverse membership is comprised of professionals in all areas of neuroscience who share clinical and/or academic interests in neuropsychiatry. *The Journal of Neuropsychiatry and Clinical Neurosciences (JNCN)* is the official publication of the organization, and a subscription is a benefit of membership.

ANPA holds an annual scientific meeting that provides the opportunity for attendees to earn continuing education and maintenance of certification credits, as well as the opportunity for collaboration among educators, clinicians, researchers, students and trainees during research presentations, symposia, workshops, and continuing education courses. Members are encouraged to submit their work for presentation at our annual meetings. Travel awards are available for promising trainee clinicians and investigators. Annual meeting abstracts and proceedings are published in *The Journal of Neuropsychiatry and Clinical Neurosciences (JNCN)*, the official publication of the organization.

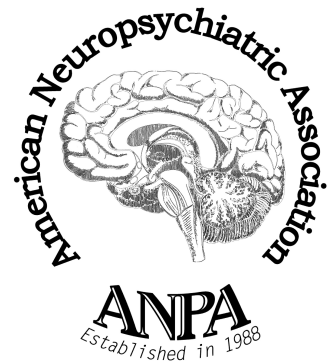

## Benefits of Membership ←

- Subscription to *The Journal of Neuropsychiatry and Clinical Neurosciences (JNCN)*
- Discounts on subscriptions to PsychiatryOnline.com including DSM Premium and DSM Premium Plus
- Opportunities for presenting at the annual meeting with accepted abstracts published in the *JNCN*
- Significantly reduced registration fees to the annual meeting
- Discounted membership and meeting registration fees for trainees and students
- Newsletters, news updates, information on job and training opportunities, research and meeting information on the ANPA web site: **www.anpaonline.org**
- Collaboration in clinical, educational and research activities with opportunities to interact with leaders in the field
- Complimentary video recordings of the annual meetings
- Access to educational slide sets assembled by the Education Committee
- Membership in Special Interest Groups (SIGs) designed to draw together ANPA members with similar clinical, research, and academic interests for the purposes of peer discussion, education, and potential collaboration

## Contact Information ←

Website: [www.anpaonline.org](http://www.anpaonline.org) • Email: [anpaoffice@gmail.com](mailto:anpaoffice@gmail.com)

## → Join ANPA Now!

**NEW!** *for Members only*

## our Web-based LECTURE SERIES

Please check the ANPA website at [www.anpaonline.org](http://www.anpaonline.org) for scheduling.

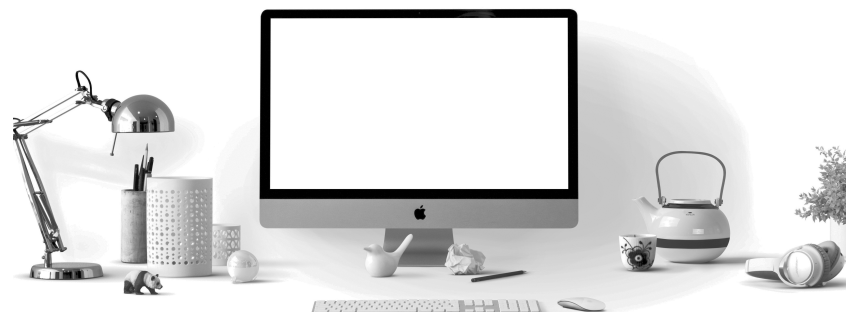

Join online at [www.anpaonline.org/join](http://www.anpaonline.org/join)

*The* American  
Neuropsychiatric  
Association

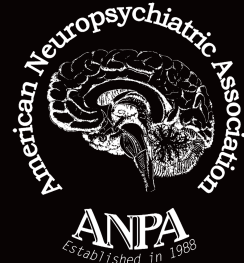

*Announces our*

32<sup>nd</sup>  
**ANPA ANNUAL**  
virtual **MEETING**

**March 17-20, 2021**

**CME Topics Will Include:**



Catatonia  
Chronic Pain  
Management of  
Dementia  
and More!

Please see our website for more information

[www.anpaonline.org](http://www.anpaonline.org)
