# The Journal of Neuropsychiatry

## and Clinical Neurosciences

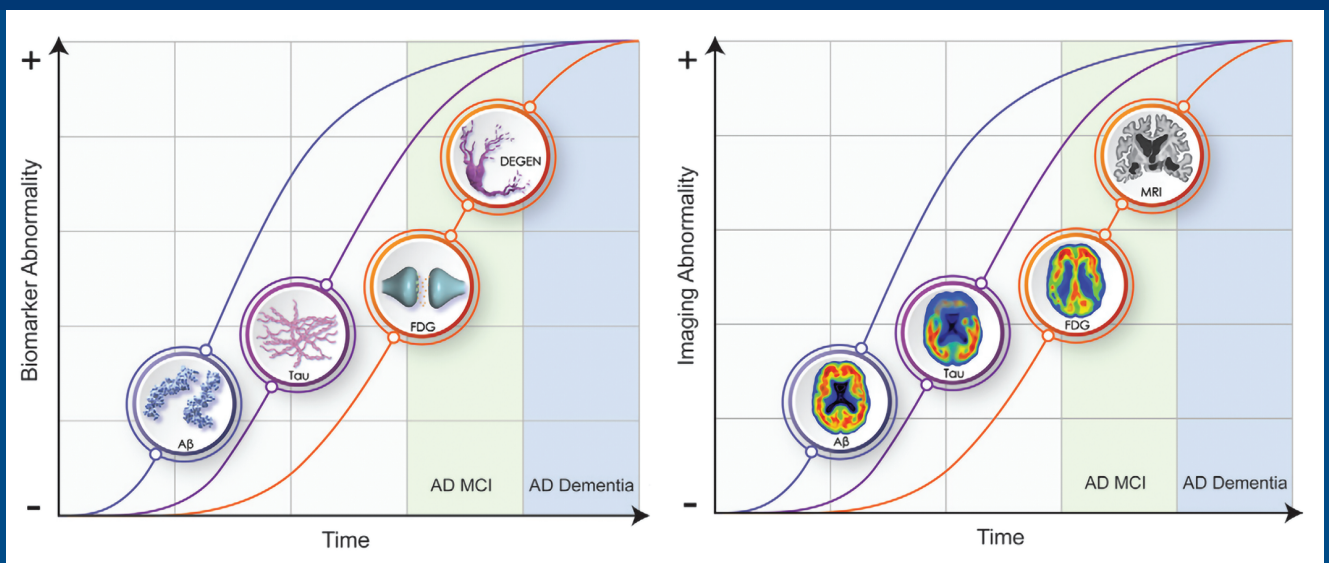

A Tribute to Katherine H. Taber, Ph.D., F.A.N.P.A.

Drug Development for Psychotropic, Cognitive-Enhancing, and Disease-Modifying Treatments for Alzheimer's Disease

A Review and Expert Opinion on the Neuropsychiatric Assessment of Motor Functional Neurological Disorders

Evidence-Based Practice for the Clinical Assessment of Psychogenic Nonepileptic Seizures: A Report From the ANPA Committee on Research

Associations Between Neuroanatomic Patterns of Cerebral Infarctions and Vascular Dementia
