# Submit to *The Journal of Neuropsychiatry and Clinical Neurosciences*

As the official Journal of the American Neuropsychiatric Association, the premier national organization of clinicians and investigators in the interdisciplinary areas of neuropsychiatry, behavioral neurology, neuropsychology, and the cognitive neurosciences, *The Journal of Neuropsychiatry and Clinical Neurosciences* is dedicated to publishing the work of renowned researchers, clinicians, and educators to advance the care of patients. *The Journal of Neuropsychiatry and Clinical Neurosciences* publishes peer-reviewed articles addressing critical subjects such as Alzheimer's disease, traumatic brain injury, Parkinson's disease, epilepsy, and seizure disorders, and is devoted to reporting discoveries in clinical neuroscience that are relevant to understanding the brain-based disorders of patients.

Contributions of our content to the literature are reflected in the *Journal's* h-index. According to Web of Science, the lifetime (1989-present) h-index of JNCN is **104**.

In 2020, our most downloaded articles included the following:

- **Functional Neurological (Conversion) Disorder: A Core Neuropsychiatric Disorder**  
From *The Journal of Neuropsychiatry and Clinical Neurosciences*, Volume 32, issue 1 (Winter 2020)  
A special issue on functional neurological disorders leads off with this editorial from the special issue editors.
- **On the Trail of White Matter**  
From *The Journal of Neuropsychiatry and Clinical Neurosciences*, Volume 32, issue 3 (Summer 2020)  
Christopher M. Filley, M.D., discusses in an Introspection piece the clinical implications of the concept of white matter dementia.
- **Temporal Processing: Neural Correlates and Clinical Relevance**  
From *The Journal of Neuropsychiatry and Clinical Neurosciences*, Volume 32, issue 2 (Spring 2020)  
The issue's "Windows to the Brain" feature.
- **Of Ghost Grandparents and Missing Limbs**  
From *The Journal of Neuropsychiatry and Clinical Neurosciences*, Volume 32, issue 4 (Fall 2020)  
In a moving Introspection piece, Miguel Restrepo-Martínez, M.D., relates how he counseled his grieving grandmother.

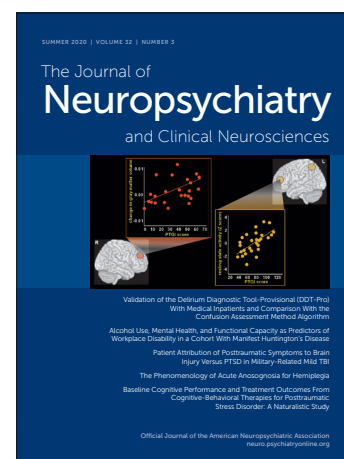

# Submissions Welcome!

The *Journal of Neuropsychiatry and Clinical Neurosciences* seeks articles for the following categories:

- **Treatment in Behavioral Neurology & Neuropsychiatry:** Using idealized clinical vignettes and high-level scholarship, these papers highlight issues in treatment that are frequently encountered but widely recognized as therapeutically, ethically, or administratively challenging.
- **Education in Behavioral Neurology & Neuropsychiatry:** Articles present, evaluate, and discuss educational methods, programs, and outcomes in neuropsychiatry education at the undergraduate medical, graduate medical, and/or postgraduate medical levels.
- **Analysis and Commentary:** Contributions present (a) focused analyses of and commentary on an article (or several related articles) on clinically important or controversial topics in neuropsychiatry that have been published recently in peer-reviewed clinical neuroscience journals (including, but not limited to, *JNCN*), with the aim of contextualizing, interpreting, or reconciling divergent findings, interpretations, and perspectives presented in those articles or (b) expert commentary on highly salient or controversial topics and articles in neuropsychiatry, where “expert” is defined by having published no fewer than five or more peer-reviewed articles that are directly relevant to the focus of the analysis and commentary.
- **Perspectives in Global Neuropsychiatry:** These articles offer insights into the practice of neuropsychiatry worldwide by describing the neuropsychiatric presentation, diagnosis, and treatment of a typical patient in a specific region or country and by highlighting the unique cultural, economic, political, and other issues that influence neuropsychiatric assessment and treatment in that country or region.
- **Icons in Neuropsychiatry:** This type of article offers historical or contemporary snapshots of neuropsychiatry’s practitioners or other images of interest (e.g., art, historic buildings, books, or monographs) to the journal’s readership and briefly describes their relevance to the field today.
- **Opinion:** These brief essays address important topics in neuropsychiatric practice, research, public health, health policy, health legislation, or ethics and generally are not commentaries on a specific article.
- **Introspections:** These works feature personal vignettes describing experiences in neuropsychiatric practice, research, education, and professional or community service that have been particularly important personally or professionally with the goal of informing the personal or professional development and experience of the Journal’s readers.

For information on submission requirements, visit the *Journal’s* Information for Authors and Reviewers:

[https://neuro.psychiatryonline.org/neuro\\_ifora](https://neuro.psychiatryonline.org/neuro_ifora)
